# Supplementary material for: Rescue of HSP70 in Spinal Neurons Alleviates Opioids-Induced Hyperalgesia via the Suppression of Endoplasmic Reticulum Stress in Rodents
Source: Front Cell Dev Biol. 2020 May 12;8:269. doi: 10.3389/fcell.2020.00269 (PMC7243285; doi:10.3389/fcell.2020.00269)
Supplement: Supplementary file 3 [file Data_Sheet_2.xlsx]

## Sheet: Sheet1
A										C														D															F
P-PKA																																							XBP1s
n=3										IRE1α																													n=3
										n=3														P-PKA
																								n=3
PKA																								PKA															β-actin
n=3																								n=3															n=3
										XBP1s
										n=3
																								β-actin
																								n=3
β-actin
n=3										Caspase-12
										n=3
B
																								E
p-NR1																								P-NR1
n=3										β-actin
																								n=3
										n=3
NR1
n=3
																								NR-1
																								n=3
β-actin
n=3																								β-actin
																								n=3
