# Supplementary material for: Rescue of HSP70 in Spinal Neurons Alleviates Opioids-Induced Hyperalgesia via the Suppression of Endoplasmic Reticulum Stress in Rodents
Source: Front Cell Dev Biol. 2020 May 12;8:269. doi: 10.3389/fcell.2020.00269 (PMC7243285; doi:10.3389/fcell.2020.00269)
Supplement: Supplementary file 4 [file Data_Sheet_3.xlsx]

## Sheet: Sheet1
												H																	J
												P-NR1												P-NR2					p-PKA											p-PKA
												n=3												n=4					n=3											n=4
G
P-PKA
n=3
																													PKA
												NR1																	n=3
												n=3
PKA
n=3
																													β-actin
												β-actin
												n=3
β-actin
n=3
												I
																													k
																																									p-NR1
																																									n=4
												XBP1s																	p-NR1
												n=3																	n=3
																																									NR2
																																									n=4
												β-actin																	NR1
												n=3																	n=3
																																									n=4
																													β-actin
																													n=3
