# Supplementary material for: Rescue of HSP70 in Spinal Neurons Alleviates Opioids-Induced Hyperalgesia via the Suppression of Endoplasmic Reticulum Stress in Rodents
Source: Front Cell Dev Biol. 2020 May 12;8:269. doi: 10.3389/fcell.2020.00269 (PMC7243285; doi:10.3389/fcell.2020.00269)
Supplement: Supplementary file 5 [file Data_Sheet_4.xlsx]

## Sheet: Sheet1
A										C
										HSP70
HSP70										n=6
n=3
B
										Transferrin
										n=6
HSP70
n=3
										D
										HSP70
										n=4
β-actin
n=3
										β-actin
										n=4
