# Supplementary material for: Rescue of HSP70 in Spinal Neurons Alleviates Opioids-Induced Hyperalgesia via the Suppression of Endoplasmic Reticulum Stress in Rodents
Source: Front Cell Dev Biol. 2020 May 12;8:269. doi: 10.3389/fcell.2020.00269 (PMC7243285; doi:10.3389/fcell.2020.00269)
Supplement: Supplementary file 6 [file Data_Sheet_5.xlsx]

## Sheet: Sheet1
A																		C																	E
																		GRP78																	IRE1α
																		n=3																	n=3
HSP70
n=3
B
																																			β-actin
																																			n=3
HSP70																		β-actin
n=3																		n=3
																																			F
																																			XBP1s
																																			n=3
β-actin																		D
n=3
																		ATF6
																		n=3
																																			β-actin
																																			n=3
																		β-actin
																		n=3
