# Supplementary material for: Rescue of HSP70 in Spinal Neurons Alleviates Opioids-Induced Hyperalgesia via the Suppression of Endoplasmic Reticulum Stress in Rodents
Source: Front Cell Dev Biol. 2020 May 12;8:269. doi: 10.3389/fcell.2020.00269 (PMC7243285; doi:10.3389/fcell.2020.00269)
Supplement: Supplementary file 9 [file Data_Sheet_8.xlsx]

## Sheet: Sheet1
A																	D																F
HSP70																	p-ERK1/2																IRE1α
n=4																	n=4																n=4
																																	β-actin
																	ERK1/2																n=4
Transferrin																	n-4
n=4
C																																	G
HSP70																	β-actin																XBP1s
n=4																	n=4																n=4
β-actin																	E																β-actin
n=4																																	n=4
																	GRP78
																	n=4
																	β-actin
																	n=4
