# Supplementary material for: Rescue of HSP70 in Spinal Neurons Alleviates Opioids-Induced Hyperalgesia via the Suppression of Endoplasmic Reticulum Stress in Rodents
Source: Front Cell Dev Biol. 2020 May 12;8:269. doi: 10.3389/fcell.2020.00269 (PMC7243285; doi:10.3389/fcell.2020.00269)
Supplement: Supplementary file 11 [file Data_Sheet_10.xlsx]

## Sheet: Sheet1
A															c																E
															GRP78
p-ERK1/2															n=3
n=3
																															XBP1s
																															n=3

															β-actin
															n=3
ERK1/2
n=3
																															β-actin
																															n=3
															D																F
β-actin
n=3
															IRE1α																Caspase-12
															n=3																n=3


B
																															β-actin
															β-actin																n=3
															n=3
HSP70
n=3


β-actin
n=3




[truncated: 1 more columns]
